# Supplementary material for: Synthesis, molecular docking, and in vitro activity of a novel angiotensin-converting enzyme 2 inhibitor, LMS1007: a potential molecule in Covid-19 and cancer treatments
Source: Royal Society of Chemistry journal article supplement (doi:10.1039/d5ra01134e), 2025-01-01
Supplement: d5ra01134e2.pdf [file d5ra01134e2.pdf]

Supplement 1 Figure 1.  $^1\text{H}$ -NMR for LMS1007

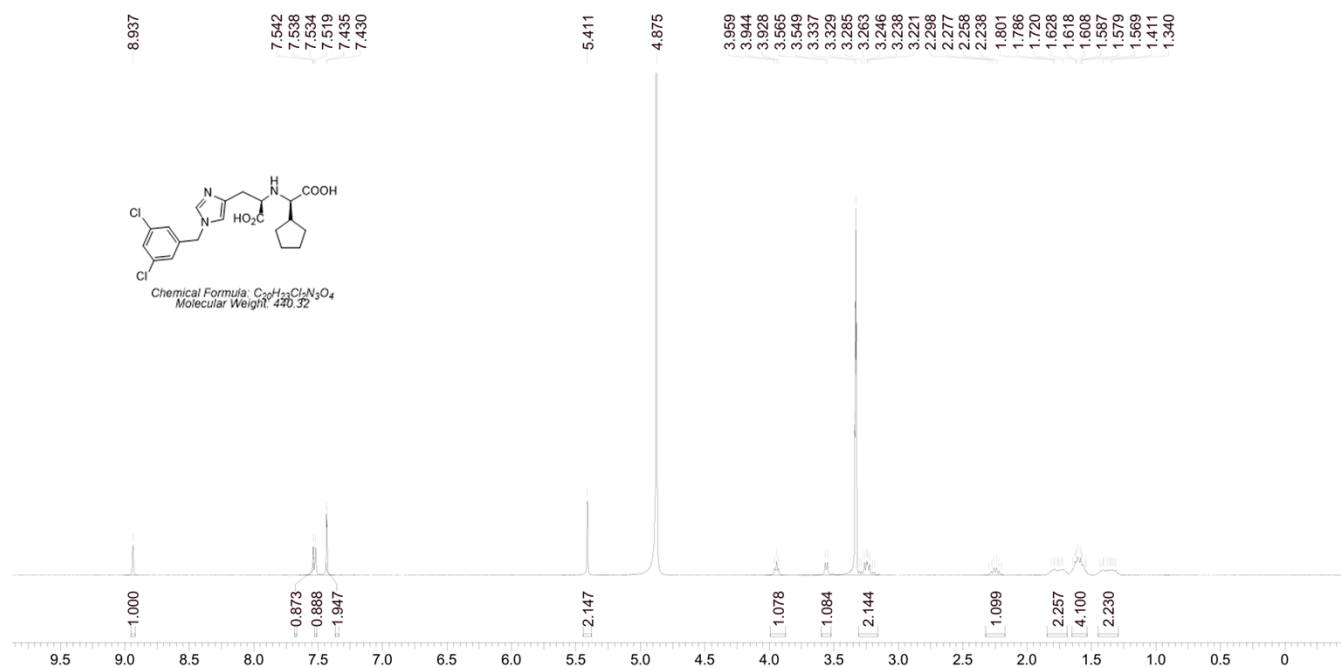

Supplement 1 Figure 2. LCMS for LMS1007

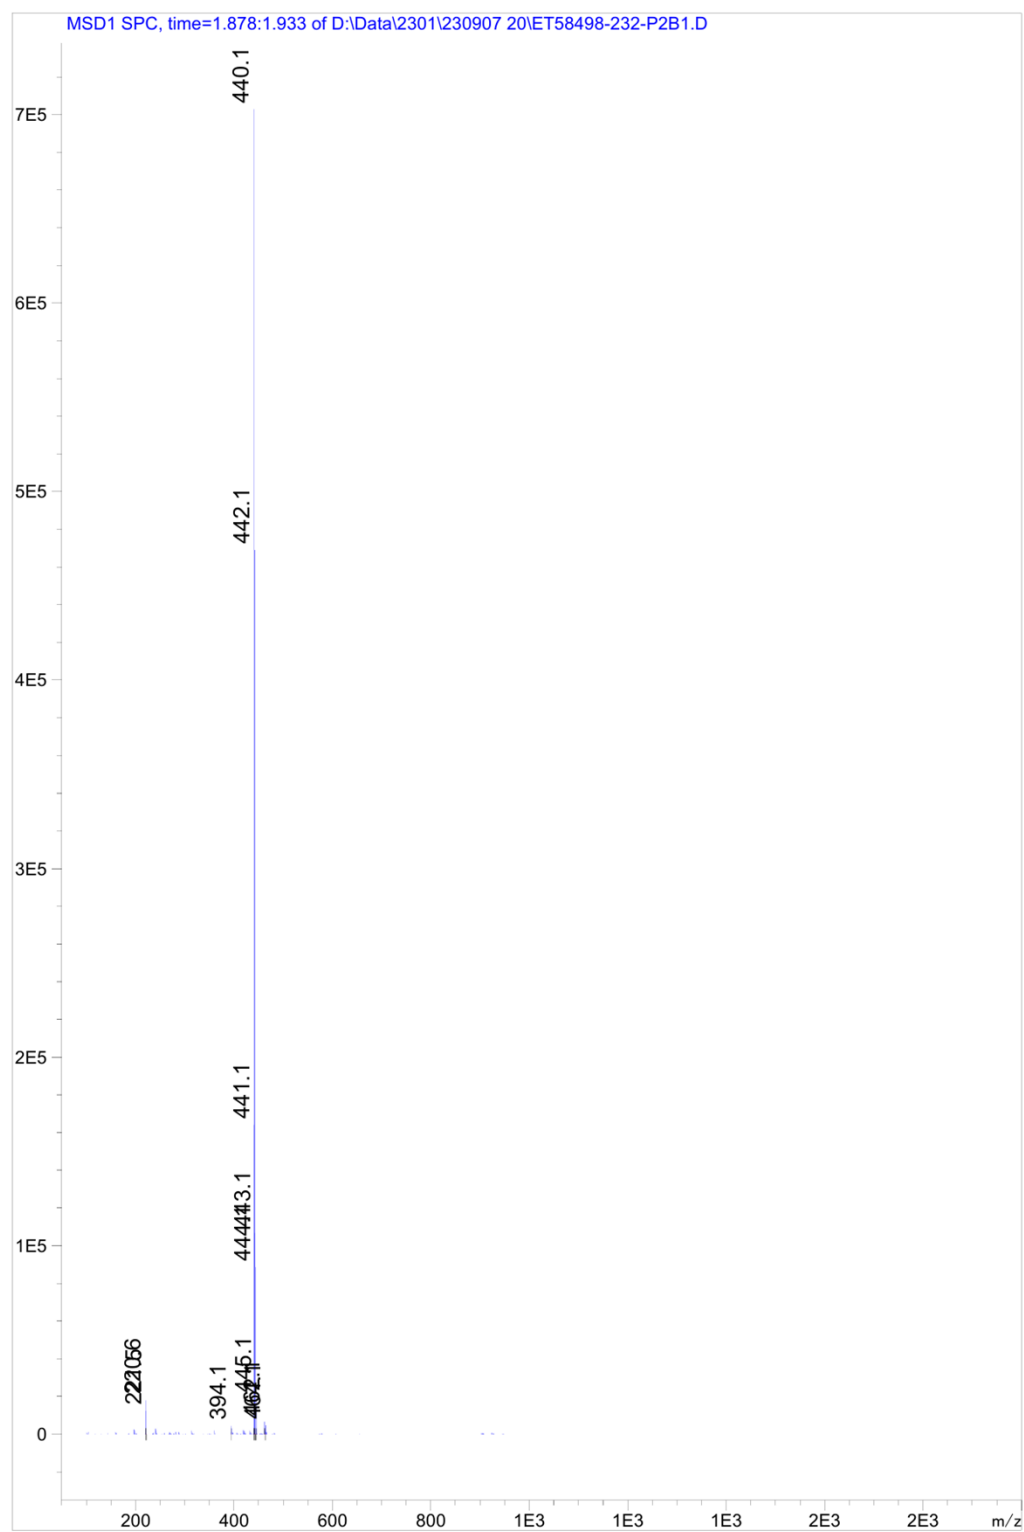

Supplement 1 Figure 3. SFC for LMS1007

Test Results

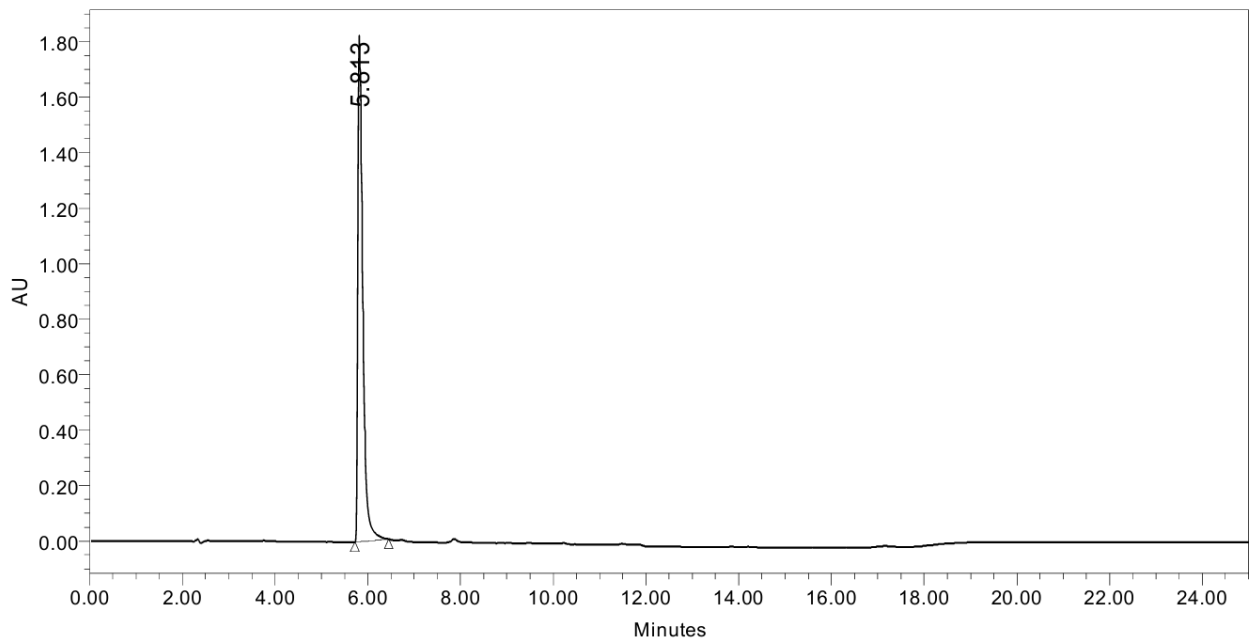

|   | RT    | Area     | % Area | Height  |
|---|-------|----------|--------|---------|
| 1 | 5.813 | 14135136 | 100.00 | 1825400 |

\*: The result above is for reference only because there is no racemate or the other enantiomer.
